# Supplementary material
Source: MDPI journal article supplement (https://www.mdpi.com/2673-1991/5/2/12)
Supplement: s1 [file s1]

## VAN WIECHEN DEVELOPMENTAL TEST (VWDT) 15-54 months of age

**Behavioural state:**

- 0 = Child is awake and alert
- 1 = Child seems tired
- 2 = Kind is fussy
- 3 = Kind cries continuously
- 4 = Otherwise: describe under 'remarks'

**Social responsiveness:**

- 0 = child is cooperative
- 1 = child is reserved and needs encouragement
- 2 = child is shy or reserved without active resistance
- 3 = child resists and struggles
- 4 = otherwise: describe under 'remarks'

**System of notation:**

- Always indicate the calendar age in the appropriate column, also in case of prematurity.
- Use a new column for each test. The column after 1 1/2 year can be used for an extra test.
- Record the result as + or -; if in doubt use -.
- Separately note right and left where asked.
- Observe as much as possible; if needed, information on features marked with (M) (Mentioned) may be gained from parents; if positive, note M.
- \* Repeat features.

Name: \_\_\_\_\_

Dat of birth: \_\_\_\_\_

Gestational age: ..... weeks

| General                                                            | 15 mth | 1½ yr | 2 yr | 2½ yr | 3 yr | 3½ yr | 4 yr | 4½ yr | Remarks                |   |   |   |   |   |   |   |   |   |                   |
|--------------------------------------------------------------------|--------|-------|------|-------|------|-------|------|-------|------------------------|---|---|---|---|---|---|---|---|---|-------------------|
| Age                                                                |        |       |      |       |      |       |      |       |                        |   |   |   |   |   |   |   |   |   |                   |
| Behavioural state                                                  |        |       |      |       |      |       |      |       |                        |   |   |   |   |   |   |   |   |   |                   |
| Social responsiveness                                              |        |       |      |       |      |       |      |       |                        |   |   |   |   |   |   |   |   |   |                   |
| <b>Fine motor activity, adaptive and personal/social behaviour</b> | R      | L     | R    | L     | R    | L     | R    | L     | R                      | L | R | L | R | L | R | L | R | L |                   |
| 11. Puts cube in and out of a box                                  |        |       |      |       |      |       |      |       |                        |   |   |   |   |   |   |   |   |   |                   |
| 12. Plays "give and take" (M)                                      |        |       |      |       |      |       |      |       |                        |   |   |   |   |   |   |   |   |   |                   |
| 13. Builds tower of 2 cubes                                        |        |       |      |       |      |       |      |       |                        |   |   |   |   |   |   |   |   |   |                   |
| 14. Explores environment (M)                                       |        |       |      |       |      |       |      |       |                        |   |   |   |   |   |   |   |   |   |                   |
| 15. Builds tower of 3 cubes                                        |        |       |      |       |      |       |      |       |                        |   |   |   |   |   |   |   |   |   |                   |
| 16. Imitates others (M)                                            |        |       |      |       |      |       |      |       |                        |   |   |   |   |   |   |   |   |   |                   |
| 17. Builds tower of 6 cubes                                        |        |       |      |       |      |       |      |       |                        |   |   |   |   |   |   |   |   |   |                   |
| 18. Places round form in form-box                                  |        |       |      |       |      |       |      |       |                        |   |   |   |   |   |   |   |   |   |                   |
| 19. Undresses himself (M)                                          |        |       |      |       |      |       |      |       |                        |   |   |   |   |   |   |   |   |   |                   |
| 20. Imitates building a truck                                      |        |       |      |       |      |       |      |       |                        |   |   |   |   |   |   |   |   |   |                   |
| 21. Places 3 forms in form-box                                     |        |       |      |       |      |       |      |       |                        |   |   |   |   |   |   |   |   |   |                   |
| 22. Imitates drawing vertical line                                 |        |       |      |       |      |       |      |       |                        |   |   |   |   |   |   |   |   |   |                   |
| 23. Imitates building a bridge                                     |        |       |      |       |      |       |      |       |                        |   |   |   |   |   |   |   |   |   |                   |
| 24. Places 4 forms in form-box                                     |        |       |      |       |      |       |      |       |                        |   |   |   |   |   |   |   |   |   |                   |
| 25. Puts on own garment (M)                                        |        |       |      |       |      |       |      |       |                        |   |   |   |   |   |   |   |   |   |                   |
| 26. Copies a circle                                                |        |       |      |       |      |       |      |       |                        |   |   |   |   |   |   |   |   |   |                   |
| 27. Holds pencil with fingers                                      |        |       |      |       |      |       |      |       |                        |   |   |   |   |   |   |   |   |   | with (R   L hand) |
| 28. Copies a cross                                                 |        |       |      |       |      |       |      |       |                        |   |   |   |   |   |   |   |   |   |                   |
| <b>Communication</b>                                               | 15 mth | 1½ yr | 2 yr | 2½ yr | 3 yr | 3½ yr | 4 yr | 4½ yr |                        |   |   |   |   |   |   |   |   |   |                   |
| 37. Says 2 "sound-words" with comprehension (M)                    |        |       |      |       |      |       |      |       |                        |   |   |   |   |   |   |   |   |   |                   |
| 38. Understands a few daily-used sentences (M)                     |        |       |      |       |      |       |      |       |                        |   |   |   |   |   |   |   |   |   |                   |
| 39. Says 3 "words" (M)                                             |        |       |      |       |      |       |      |       |                        |   |   |   |   |   |   |   |   |   |                   |
| 40. Understands 'play' orders (M)                                  |        |       |      |       |      |       |      |       |                        |   |   |   |   |   |   |   |   |   |                   |
| 41. Says "sentences" of 2 words (M)                                |        |       |      |       |      |       |      |       |                        |   |   |   |   |   |   |   |   |   |                   |
| 42. Points at 6 parts of body of a doll (M)                        |        |       |      |       |      |       |      |       |                        |   |   |   |   |   |   |   |   |   |                   |
| 43. Refers to self using "me" or "I" (M)                           |        |       |      |       |      |       |      |       |                        |   |   |   |   |   |   |   |   |   |                   |
| 44. Points at 5 pictures in the book                               |        |       |      |       |      |       |      |       |                        |   |   |   |   |   |   |   |   |   |                   |
| 45. Says "sentences" of 3 or more words (M)                        |        |       |      |       |      |       |      |       |                        |   |   |   |   |   |   |   |   |   |                   |
| 46. Speech is understood by acquaintances (M)                      |        |       |      |       |      |       |      |       |                        |   |   |   |   |   |   |   |   |   |                   |
| 47. Talks spontaneously about events at home/playgroup (M)         |        |       |      |       |      |       |      |       |                        |   |   |   |   |   |   |   |   |   |                   |
| 48. Asks questions about "who", "what", "where" and "how" (M)      |        |       |      |       |      |       |      |       |                        |   |   |   |   |   |   |   |   |   |                   |
| 49. Speech is easily understood by examiner                        |        |       |      |       |      |       |      |       |                        |   |   |   |   |   |   |   |   |   |                   |
| 50. Asks questions about "how much", "when", "why"? (M)            |        |       |      |       |      |       |      |       |                        |   |   |   |   |   |   |   |   |   |                   |
| 51. Understands analogies and oppositions (M)                      |        |       |      |       |      |       |      |       |                        |   |   |   |   |   |   |   |   |   |                   |
| <b>Gross motor activity</b>                                        | 15 mth | 1½ yr | 2 yr | 2½ yr | 3 yr | 3½ yr | 4 yr | 4½ yr |                        |   |   |   |   |   |   |   |   |   |                   |
| 66. Crawls, abdomen off the floor (M)                              |        |       |      |       |      |       |      |       |                        |   |   |   |   |   |   |   |   |   |                   |
| 67. Walks along (M)                                                |        |       |      |       |      |       |      |       |                        |   |   |   |   |   |   |   |   |   |                   |
| 68.* Walks alone/walks well alone/walks smoothly                   |        |       |      |       |      |       |      |       | (first time:.....mths) |   |   |   |   |   |   |   |   |   |                   |
| 69. Throws ball without falling down                               |        |       |      |       |      |       |      |       |                        |   |   |   |   |   |   |   |   |   |                   |
| 70. Squats or bends to pick up things                              |        |       |      |       |      |       |      |       |                        |   |   |   |   |   |   |   |   |   |                   |
| 71. Kicks ball                                                     |        |       |      |       |      |       |      |       |                        |   |   |   |   |   |   |   |   |   |                   |
| 72. Can rotate fluently in sitting position                        |        |       |      |       |      |       |      |       |                        |   |   |   |   |   |   |   |   |   |                   |
| 73. Rides (tri)cycle (M)                                           |        |       |      |       |      |       |      |       |                        |   |   |   |   |   |   |   |   |   |                   |
| 74. Jumps with both feet simultaneously                            |        |       |      |       |      |       |      |       |                        |   |   |   |   |   |   |   |   |   |                   |
| 75. Can stand on one foot at least 5 seconds                       |        |       |      |       |      |       |      |       |                        |   |   |   |   |   |   |   |   |   |                   |

**VAN WIECHEN DEVELOPMENTAL TEST (VWDT) 0-12 (15) months of age.**

*Behavioural state:*  
 0 = Child is awake and alert  
 1 = Child seems tired  
 2 = Child is fussy  
 3 = Child cries continuously  
 4 = Otherwise: describe under 'remarks'

*System of notation:*  
 • Always indicate the calendar age in the appropriate column, also in case of prematurity.  
 • Use a new column for each test. The columns after 3 and 6 months can be used for extra tests.  
 • Record the result as + or -; if in doubt use -.  
 • Separately note right and left where asked.  
 • Observe as much as possible; if needed, information on features marked with (M) (Mentioned) may be gained from parents; if positive, note M.  
 \* Repeat features.

Name: \_\_\_\_\_  
 Date of birth: \_\_\_\_\_  
 Gestational age: ..... weeks

| General           | 4 wks |   | 8wks  |   | 13 wks |   | 26 wks |   | 39 wks |   | 52 wks |   | 65 wks |   | Remarks |
|-------------------|-------|---|-------|---|--------|---|--------|---|--------|---|--------|---|--------|---|---------|
|                   | 1 mth |   | 2 mth |   | 3 mth  |   | 6 mth  |   | 9 mth  |   | 12 mth |   | 15 mth |   |         |
| Age               |       |   |       |   |        |   |        |   |        |   |        |   |        |   |         |
| Behavioural state |       |   |       |   |        |   |        |   |        |   |        |   |        |   |         |
|                   | R     | L | R     | L | R      | L | R      | L | R      | L | R      | L | R      | L |         |

**Fine motor activity, adaptive and personal/social behaviour**

|                                                    |  |  |  |  |  |  |  |  |  |  |  |  |  |  |  |
|----------------------------------------------------|--|--|--|--|--|--|--|--|--|--|--|--|--|--|--|
| 1. Eyes fixate                                     |  |  |  |  |  |  |  |  |  |  |  |  |  |  |  |
| 2. Follows with eyes and head 30° ← 0° → 30°       |  |  |  |  |  |  |  |  |  |  |  |  |  |  |  |
| 3. Hands occasionally open                         |  |  |  |  |  |  |  |  |  |  |  |  |  |  |  |
| 4. Watches own hands (M)                           |  |  |  |  |  |  |  |  |  |  |  |  |  |  |  |
| 5. Plays with hands in midline                     |  |  |  |  |  |  |  |  |  |  |  |  |  |  |  |
| 6. Supine position: grasps object within reach     |  |  |  |  |  |  |  |  |  |  |  |  |  |  |  |
| 7. Passes cube from hand to hand                   |  |  |  |  |  |  |  |  |  |  |  |  |  |  |  |
| 8. Holds cube, grasps another one with other hand  |  |  |  |  |  |  |  |  |  |  |  |  |  |  |  |
| 9. Plays with both feet (M)                        |  |  |  |  |  |  |  |  |  |  |  |  |  |  |  |
| 10. Picks up pellet between thumb and index finger |  |  |  |  |  |  |  |  |  |  |  |  |  |  |  |
| 11. Puts cube in and out of a box                  |  |  |  |  |  |  |  |  |  |  |  |  |  |  |  |
| 12. Plays "give and take" (M)                      |  |  |  |  |  |  |  |  |  |  |  |  |  |  |  |

**Communication**

|                                                 | 1 mth. | 2 mth | 3 mth | 6 mth | 9 mth | 12 mth | 15 mth |                       |
|-------------------------------------------------|--------|-------|-------|-------|-------|--------|--------|-----------------------|
| 29. Reacts when spoken to (M)                   |        |       |       |       |       |        |        |                       |
| 30. Smiles in response (M)                      |        |       |       |       |       |        |        | (first time:.....wks) |
| 31. Vocalizes in response (M)                   |        |       |       |       |       |        |        |                       |
| 32. Produces varying sounds (M)                 |        |       |       |       |       |        |        |                       |
| 33. Says "dada-baba" or "gaga"(M)               |        |       |       |       |       |        |        |                       |
| 34. Babbles while playing (M)                   |        |       |       |       |       |        |        |                       |
| 35. Reacts to verbal request (M)                |        |       |       |       |       |        |        |                       |
| 36. Makes communicative gestures (M)            |        |       |       |       |       |        |        |                       |
| 37. Says 2 "sound-words" with comprehension (M) |        |       |       |       |       |        |        |                       |
| 38. Understands a few daily-used sentences (M)  |        |       |       |       |       |        |        |                       |

**Gross motor activity**

|                                                    | 1 mth | 2 mth | 3 mth | 6 mth | 9 mth | 12 mth | 15 mth |  |
|----------------------------------------------------|-------|-------|-------|-------|-------|--------|--------|--|
| 52. *Moves arms equally frequent                   |       |       |       |       |       |        |        |  |
| 53. * Moves legs equally frequent                  |       |       |       |       |       |        |        |  |
| 54. * Stays suspended when lifted under armpits    |       |       |       |       |       |        |        |  |
| 55. * Reactions if pulled to sitting               |       |       |       |       |       |        |        |  |
| 56. Lifts chin off table for a moment              |       |       |       |       |       |        |        |  |
| 57. Lifts head to 45° in prone position            |       |       |       |       |       |        |        |  |
| 58. Looks around to side with angle face-table 90° |       |       |       |       |       |        |        |  |
| 59. Flexes or stomps legs while being swung        |       |       |       |       |       |        |        |  |
| 60. Rolls over, back and forth (M)                 |       |       |       |       |       |        |        |  |
| 61. Balances head well while sitting               |       |       |       |       |       |        |        |  |
| 62. Sits on buttocks while legs stretched          |       |       |       |       |       |        |        |  |
| 63. Sits in stable position, without support       |       |       |       |       |       |        |        |  |
| 64. Crawls forward, abdomen on the floor (M)       |       |       |       |       |       |        |        |  |
| 65. Pulls up to standing position (M)              |       |       |       |       |       |        |        |  |
| 66. Crawls, abdomen off the floor (M)              |       |       |       |       |       |        |        |  |
| 67. Walks along (M)                                |       |       |       |       |       |        |        |  |
